**1 Title page**

**2 Title:** Acute sleep deprivation induces synaptic remodeling at the soleus muscle  
**3 neuromuscular junction in rats**

**4**

**5 Author list**

**6 Binney Sharma<sup>a,1</sup>**

**7 Email:** [binney026@gmail.com](mailto:binney026@gmail.com)

**8 Avishek Roy<sup>a,1</sup>**

**9 Email:** [roy13avishek@gmail.com](mailto:roy13avishek@gmail.com)

**10 Trina Sengupta<sup>a,d</sup>**

**11 Email:** [sengupta.trina3@gmail.com](mailto:sengupta.trina3@gmail.com)

**12 Lal Chandra Vishwakarma<sup>a</sup>**

**13 Email:** [lalchandra.01@gmail.com](mailto:lalchandra.01@gmail.com)

**14 Anuraag Singh<sup>c</sup>**

**15 Email:** [anuraag.delhi@gmail.com](mailto:anuraag.delhi@gmail.com)

**16 RiteshNetam<sup>a</sup>**

**17 Email:** [ritesh.n.1912@gmail.com](mailto:ritesh.n.1912@gmail.com)

**18 Tapas Chandra Nag<sup>b</sup>**

**19 Email:** [tapas\\_nag@aiims.edu](mailto:tapas_nag@aiims.edu)

**20 Nasreen Akhtar<sup>a</sup>**

**21 Email:** [drnasreenakhtar@gmail.com](mailto:drnasreenakhtar@gmail.com)

**22 Hruda Nanda Mallick<sup>ab\*</sup>**

**23 Email:** [drhmallick@yahoo.com](mailto:drhmallick@yahoo.com)

**24** <sup>a</sup> Department of Physiology, All India Institute of Medical Sciences, New Delhi – 110029

**25** <sup>b</sup> Department of Physiology, Faculty of Medicine & Health Sciences, SGT University,  
**26** Gurugram, Haryana- 122505

**27** <sup>c</sup> Department of Anatomy, All India Institute of Medical Sciences, New Delhi – 110029

**28** <sup>d</sup> Department of Physiology, All India Institute of Medical Sciences, Jodhpur – 342005

**29** <sup>a, c</sup> Work was done: Department of Physiology and Department of Anatomy, All India  
**30** Institute of Medical Sciences, New Delhi – 110029

**31** <sup>1</sup>B.S. and A.R. contributed equally to this study.

**32** \*Corresponding authors

**33** Dr. HN Mallick, Professor, Department of Physiology, Faculty of Medicine & Health  
**34** Sciences, SGT University, Gurugram, Haryana- 122505, email: [drhmallick@yahoo.com](mailto:drhmallick@yahoo.com)

**35**

## 1 **Abstract**

2 Sleep is important for cognitive and physical performance. Sleep deprivation not only affects  
3 neural functions but also results in muscular fatigue. A good night's sleep reverses these  
4 functional derangements caused by sleep deprivation. The role of sleep in brain function has  
5 been extensively studied. However, its role in neuromuscular junction or skeletal muscle  
6 morphology is sparsely addressed although skeletal muscle atonia and suspended  
7 thermoregulation during rapid eye movement sleep possibly provides a conducive  
8 environment for the muscle to rest and repair; somewhat similar to slow-wave sleep for  
9 synaptic downscaling. In the present study, we have investigated the effect of 24 h sleep  
10 deprivation on the neuromuscular junction morphology and neurochemistry using electron  
11 microscopy and immunohistochemistry in the rat soleus muscle. Acute sleep deprivation  
12 altered synaptic ultra-structure viz. mitochondria, synaptic vesicle, synaptic proteins, basal  
13 lamina, and junctional folds needed for neuromuscular transmission. Further acute sleep  
14 deprivation showed the depletion of the neurotransmitter acetylcholine and the overactivity of  
15 its degrading enzyme acetylcholine esterase at the neuromuscular junction. The impact of  
16 sleep deprivation on synaptic homeostasis in the brain has been extensively reported recently.  
17 The present evidence from our studies shows new information on the role of sleep on  
18 neuromuscular junction homeostasis and its functioning.

19 **Keywords:** Synaptic junctions, plasticity, neuromuscular transmission, sleep physiology,  
20 transmission electron microscopy, immunohistochemistry

## **1 Statement of significance**

**2** Sleep causes synaptic downscaling in the brain, and allows the brain to carry out various  
**3** housekeeping functions. Here we have reported that the function of the sleep-wake cycle on  
**4** the synaptic homeostasis extends beyond the brain. Acute sleep deprivation caused  
**5** significant alteration at ultra and macrostructure of antigravity muscle and the neuromuscular  
**6** junction along with adaptation to new fiber type in rats. These morpho-functional changes  
**7** were well correlated with the biochemical assessment of the acetylcholine at the  
**8** neuromuscular junction. These changes were partially recovered when the rats were allowed  
**9** to recover from sleep deprivation. The findings suggest a new avenue for a sleep study;  
**10** employing the neuromuscular junction for exploring the effect of sleep at energy and synaptic  
**11** homeostasis levels.

**12**

## 1 Introduction

2 Sleep is an enigmatic physiological state, essential for our general and emotional  
3 well-being<sup>1</sup>. Most of the studies focus on the association of sleep with the brain. The role of  
4 sleep in neurogenesis and synaptic plasticity of the brain is well documented<sup>2-5</sup>. The slow-  
5 wave sleep (SWS) and rapid eye movement (REM) sleep favor neurogenesis in the brain  
6 areas like the subventricular zone and dentate gyrus of hippocampal proper, which later  
7 proliferates into adult brain neurons<sup>6,7</sup>. Sleep consolidates memory while sleep deprivation  
8 impairs memory consolidation<sup>8</sup>. Studies in *Drosophila* have shown the up and  
9 downregulation of many synaptic proteins in the brain during sleep and wake<sup>5</sup>. Deranged  
10 cognitive function is associated with sleep deprivation<sup>9</sup>.

11 During wakefulness, synaptic potentiation is strengthened by glutamatergic synapses.  
12 Sleep reduces this energy burden by causing synaptic downscaling, sparing the most robust  
13 neural connections<sup>10</sup>. This theory is supported by an experiment where the application of  
14 long-term potentiation enhancing neuromodulators caused local cortical slow-wave activity  
15 (SWA), and also improved learning of a particular task following sleep<sup>9</sup>. However, as pointed  
16 by Matthew Walker in his book “Why We Sleep: The New Science of Sleep and Dreams” -  
17 there does not seem to be one major organ in the body or process within the brain that is not  
18 optimally enhanced by sleep and detrimentally impaired when we do not get enough sleep<sup>11</sup>.  
19 Previous reports suggest that sleep has a restorative effect at the systemic, cellular, and  
20 network-level of various organs other than the brain<sup>12-14</sup>. The most consistent daytime  
21 complaint associated with insomnia or sleep deprivation is fatigue<sup>15-17</sup>. Sleep is usually  
22 acknowledged as an effective countermeasure against fatigue<sup>18,19</sup>. Decrease in muscle tone as  
23 we enter into SWS from the wake, and subsequent muscle atonia during REM sleep is a  
24 landmark electrophysiological signature of sleep besides EEG changes<sup>20</sup>. Moreover, REM  
25 sleep muscle atonia is because of postsynaptic inhibition of motor neurons<sup>21</sup>.

1            However, our knowledge of the effect of sleep on muscle as an excitable tissue is  
2 limited. The hypothesized effects of sleep loss on muscle function have been largely inferred  
3 based on metabolic and endocrine phenomena that accompany long-term REM sleep  
4 deprivation<sup>20,21</sup>. There is paucity of studies on the morphology and physiology of  
5 neuromuscular junction (NMJ), after acute sleep deprivation. In this novel study, we have  
6 employed the NMJ as a prototype of the peripheral synapse<sup>22,23</sup> to investigate the function of  
7 sleep on the muscle and the NMJ in rats. We have investigated the histochemical, neuro-  
8 morphometric, muscle type adaptation, biochemical estimation of the neurotransmitter, and  
9 transmission electron microscopic (TEM) ultra-structure of the synaptic level changes of  
10 NMJ during sleep, after 24 h sleep deprivation, and after recovery from 24 h sleep  
11 deprivation in the male Wistar rats.

12

## 13 **Methods**

### 14 **Experimental model and subject details**

15            Adult male Wistar rats (n=30) were used for the experiments. All the experiments  
16 were performed following the U.S. National Institute of Health guidelines for the care of  
17 animals in research<sup>24</sup>. Efforts were made to minimize the suffering of the animals and also  
18 their number. The rats were divided into three groups where the group I rats had a normal  
19 sleep-wake (SW) cycle, group II rats were subjected to 24 h sleep deprivation, and group III  
20 rats were allowed to recover from 24 h sleep deprivation. The Institutional Animal Ethics  
21 Committee approved all the methods used in this research work (960/IAEC/16).

### 22 **Surgical implantation of electrodes for sleep recording**

23            The rats were intraperitoneally anesthetized with sodium pentobarbitone (Aldrich  
24 Thomas Co, USA) at a dose of 40 mg/kg body weight [BW], and then the surgical  
25 implantation of electrodes for sleep recording was done. Two stainless-steel screw electrodes

1 of 2 mm diameter were stereotaxically implanted bilaterally on the skull over the frontal  
2 cortex (AP 2.0 mm ML  $\pm$  4.0mm at A 9.0) as per De Groot's Atlas (1959), to record  
3 electroencephalogram (EEG)<sup>25</sup>. Two 40 G stainless-steel wires were wound in a loop, and  
4 soldered to the uninsulated end of flexible radio wires, to record electromyogram (EMG) and  
5 electrooculogram (EOG). Two such loop electrodes were bilaterally fixed on the dorsal  
6 nuchal muscles and in the external canthus of the eye respectively for the recordings of EMG  
7 and EOG<sup>26</sup>. All these electrodes were then soldered to a socket and the entire head assembly  
8 was secured to the skull with three implanted anchoring screws and fixed with dental cement  
9 (The Bombay Burmah Trading Corporation Ltd, India).

## 10 **Experimental design**

11 After the complete recovery from the surgery, in group I (control, n=10) rats,  
12 continuous 24 h recording of SW parameters was done on three alternate days, starting from  
13 10:00 h in the morning till the next morning 10:00 h. The control rats were allowed to sleep  
14 in their recording chamber kept in a sound-proof room without any disturbance. In group II,  
15 (24 h sleep-deprived), after taking three baseline recordings of normal SW cycle, the rats  
16 (n=10) were sleep deprived for a period of 24 h by multiple inverted flowerpot method<sup>27,28</sup>,  
17 during which, SW was continuously recorded. For group III (sleep recovery, n=10); after  
18 three baseline SW cycles, the rats were subjected to 24 h sleep deprivation, and then recovery  
19 from sleep deprivation was monitored digitally (BIOPAC BSL 4.0 M36 Systems Inc, USA).  
20 In all the three groups, a series of experiments were performed including histology of soleus  
21 muscle (n=15, 5 each in three groups), myosin ATPase activity of soleus muscle fibers (n=18,  
22 6 each in three groups), immunolabelling for pre and post-synaptic structures at soleus  
23 muscle NMJ (n=18, 6 each in three groups), ultrastructural changes of soleus muscle NMJ  
24 (n=30, 10 each in three groups), and biochemical estimation of synaptic neurotransmitter. For  
25 the neuro-morphometric assessment done by immunolabelling experiment, 240 soleus muscle  
6

1 NMJs was studied via fluorescence imaging, where 80 NMJs were studied for the three  
2 groups individually. To evaluate ultrastructural changes in the NMJ via TEM we have used  
3 muscle tissue samples from 10 rats for each of the three groups (n=30). Soleus muscle  
4 homogenate was used for biochemical estimation of NMJ neurotransmitter acetylcholine  
5 (ACh) and its rate-limiting enzyme acetylcholine esterase (AChE).

## 6 **Sleep deprivation method**

7 Multiple inverted flowerpot method was used to sleep deprive the group II and III  
8 rats. A single rat was placed at one time on an inverted round flowerpot of 6.5 cm diameter  
9 kept in a water tank of dimension (123 x 44 x 44) cm. Eight such inverted round flowerpots  
10 were kept in a tank filled with water to a level 1 cm below the upper surface of the platforms,  
11 where food was kept on each of the platforms. Continuous electrophysiological monitoring  
12 was performed in the rat subjected to the sleep deprivation paradigm. After 24 h of sleep  
13 deprivation, rats were returned to their home cage where *ad libitum* food and water were  
14 provided to them. Further 1 day of sleep recovery recording was continued in their home cage  
15 for the group III rats. This multiple platform method is an effective method for sleep  
16 deprivation as well as to study the sleep rebound effect<sup>27,28</sup>.

## 17 **Acquisition and quantification of sleep parameters**

18 During one week of postoperative recovery from the surgery, the rats were assessed  
19 by observing the body temperature, food-water intake, and general behavior. After recovery  
20 from the surgery, the animals were habituated and allowed to move freely in the recording  
21 chamber for a day, with the EEG, EOG, and EMG cables connected to the head assembly.  
22 The recording chamber was maintained at room temperature and lights-on period same as  
23 that maintained in the animal house. Sleep parameters were recorded through a digital  
24 polygraph (BIOPAC BSL 4.0 M36 Systems Inc, USA). Continuous 24 h recording of SW  
25 stages were collected at an interval of 15 s, and were averaged for a 15 min epoch and are

1 represented as the mean  $\pm$  standard error of the mean (SEM). Manual scoring of sleep was  
2 done for these 15 s epochs and staged as SWS (S) and REM sleep<sup>29</sup>. The SWS was classified  
3 as light slow-wave (S1) and deep slow-wave sleep (S2), wakefulness as quiet wake (QW),  
4 and active wake (AW).

## 5 **Tissue isolation and harvesting**

6 After completion of the sleep deprivation protocol, animals were sacrificed by  
7 asphyxiation with CO<sub>2</sub> and soleus muscle was dissected in dehumidified filter paper placed  
8 on ice. This is done to avoid stress response in the tissue of interest. All excisions were done  
9 keeping in mind not to cause unnecessary damage to the vasculature and excessive bleeding  
10 that would compromise the tissue viability. To assess the muscle mass, the wet weight of the  
11 soleus muscle of all the animals from the three groups has been obtained (n=6 each group).  
12 For histological preparation, we have placed the dissected muscle directly into isopentane (2-  
13 methyl butane, Sigma Aldrich, USA) pre-cooled in liquid nitrogen until processed for  
14 sectioning. For histological and whole mount preparations samples were taken on pre-coated  
15 slides in gelatine (3% in 1X PBS, w/v), while for TEM, the copper grid was used to take  
16 ultrathin sections. For TEM, muscle tissue underwent intermittent immersion fixation with  
17 glutaraldehyde (2.5%, in 1X PB, v/v). For immunostaining, the whole-mount preparation was  
18 made followed by fixation and teasing in paraformaldehyde (4% in 1X PB at 4°C). For  
19 neurobiochemical analysis wet weight of muscle was taken and homogenized in ice-cold  
20 phosphorylated buffer saline (1X) and processed further with centrifugation.

## 21 **Sectioning of soleus muscle for histology**

22 The soleus muscle of each rat from the 3 groups was isolated and overnight snap-  
23 frozen in pre-cooled isopentane in liquid nitrogen. Then 20  $\mu$ m transverse sections of the



1 frozen soleus muscle were cut by cryotome and stained with hematoxylin and eosin for  
2 histological examination.

---

### 3 **Histochemical assay for myosin ATPase**

4 Muscle sections of 10  $\mu\text{m}$  diameter were preincubated in Tris-Calcium buffer  
5 (pH=10.2) at 37°C for 20 min. The slides were then washed 3 times with tap water followed  
6 by 3 times washing with deionized water. After incubating the slides in Tris-Calcium +  
7 ATPase solution (pH=9.4) at 37°C for 30 min, it was twice washed with 1% Calcium  
8 Chloride and 2% Cobalt Chloride solution. Slides were then washed with deionized water and  
9 were kept in ammonium sulfate solution for 5 to 6 sec. After this, the slides were mounted  
10 with gelatin, to quantify myosin ATPase activity.

### 11 **Quantification for myosin ATPase activity**

12 The soleus muscle sections (n=6 from each group) were viewed under Nikon upright  
13 motorized microscope (Nikon Ni-E with NIS elements, Japan) equipped with fluorescent  
14 filters. The cells expressing the myosin fibers were visually identified, and the number of  
15 cells was counted in Fiji (Image J) using a cell counter application (<http://imagej.nih.gov/ij>).  
16 Four random fields in all the sections were counted for each rat. All counting values were  
17 averaged to give a single value for each rat. The microscopic field under 40x magnifications  
18 represented an area of 86056.90  $\mu\text{m}^2$ .

### 19 **Soleus muscle preparation for immunohistochemistry**

20 Soleus muscle samples were obtained from the amputated limb immediately after the  
21 animals from each group were sacrificed. Small blocks of tissue, containing full-length  
22 muscle fibers from origin to insertion ( $\approx 2$  cm in length) were removed from each of the  
23 selected muscles and were either immediately fixed in 4% paraformaldehyde for 1 h or  
24 placed on wet ice. Small bundles of 25-30 muscle fibers were teased out from the larger

1 blocks/whole muscles and of a size suitable for whole-mount preparation. Muscles were  
2 immediately fixed in 4% paraformaldehyde for 30 min and then washed in 1% phosphate-  
3 buffered saline (PBS). For immunohistochemistry, the selected muscle tissue was cryo-  
4 sectioned using the cryostat microtome (MICROM HM 550, Thermo Scientific, USA). It is  
5 an open-top, rotary microtome that can section the tissues ranging from 1 to 50  $\mu\text{m}$  in  
6 thickness with an increment of 1  $\mu\text{m}$ . Eighty NMJs obtained from each rat of the three groups  
7 were then immunolabelled for presynaptic neurofilament with 2H3, for synaptic vesicle  
8 proteins with SV2, for synaptophysin with SYP and postsynaptic for ACh receptors (AChR)  
9 with  $\alpha$ -bungarotoxin ( $\alpha$ -BTX).

#### 10 **Immunolabelling with different markers for pre and post-synaptic proteins**

11 Immunolabelling with  $\alpha$ -BTX was done for 30 min followed by application of 4%  
12 Triton X for 90 min. The 'block' containing 4% bovine serum albumin (BSA) and 2% Triton  
13 X was kept for 30 min. The primary antibodies (Mouse anti-2H3, neurofilament 165) at the  
14 concentration ratio of 1:50, Mouse anti- SV2 (synaptic vesicles) at the ratio of 1:50 was  
15 purchased from Developmental Studies Hybridoma Bank. Mouse anti- Syp (synaptophysin)  
16 at the concentration ratio of 1:50 was purchased from Biogene and  $\alpha$ -BTX-tetramethyl  
17 rhodamine at the concentration ratio of 1:500 was procured from Bungarus multicinctus  
18 (Formosan Banded Krait, Sigma Aldrich, USA). All these primary antibodies were added to  
19 the block for 3 nights at 4°C and then washed 4 times with 1xPBS. The secondary antibodies,  
20 Alexa Fluor 48 donkey anti-mouse IgG secondary antibody at the ratio of 1:50 (Thermo  
21 Fischer Scientific) were then added for 1 night at 4°C followed by 4 times washing with  
22 1xPBS. Preparations were then whole-mounted on slides with fluorosheild and DAPI  
23 purchased from Sigma Aldrich, USA. These whole mounted slides were then stored at -20°C  
24 before imaging.

#### 25 **Parameters evaluated from NMJ images**

1 For the neuro-morphometric analysis of NMJ obtained after immunohistochemistry in  
2 group I, II and III rats, we have used NMJ-morph software<sup>30</sup>. Out of 256 NMJ studied, 80  
3 were analyzed for the three groups of rats. From the 80 NMJ, images obtained from the three  
4 groups of rats, core derived, and associated nerve-muscle variables from pre and post-synapse  
5 were evaluated. In the pre-synaptic core variables, we have evaluated nerve terminal area and  
6 perimeter, the terminal branch number (n), terminal branch point (s), and the total length of  
7 the branches (l). At the post-synaptic level, the core variables evaluated were the area,  
8 perimeter, and cluster of AChR. The endplate area, perimeter, and diameter were also  
9 evaluated at the post-synapse. For the derived variable, at the pre-synaptic level the average  
10 branch length and the complexity were evaluated using the following formula:

11 Average branch length ( $\mu$ ) =  $1/n$

12 Complexity =  $\log_{10}$  [no. of terminal branches (n) x no. of branch points (s) x  
13 total length of branches (l)] =  $\log_{10}$  (n x s x l)

14 At the post-synaptic level, the average area of the AChR clusters was evaluated. The  
15 fragmentation, compactness, overlap, and the area of the synaptic contact were evaluated  
16 using the following formula:

17 Fragmentation =  $1 - [1/(\text{no. of AChR clusters})]$

18 Compactness =  $(\text{AChR area} / \text{end plate area}) \times 100$

19 Overlap =  $[(\text{total AChR area} - \text{unoccupied AChR area}) / (\text{total AChR area})] \times 100$

20 Area of synaptic contact = total AChR area – the unoccupied area of AChR

21 For the associated nerve and muscle variable, the diameter of the axon and the muscle fiber  
22 along with the number of axonal inputs were determined.

### 23 **Soleus muscle preparation for TEM**

24 Soleus muscles from all 3 groups of rats were dissected and immediately fixed with a  
25 mixture of 2% (w/v) PFA and 2.5% (w/v) glutaraldehyde (TAAB) in 0.1 M phosphate buffer

1 (PB) pH 7.4 at 4°C for 24 h. Subsequently, samples were post-fixed with 1% (w/v) OsO<sub>4</sub>  
2 supplemented with 1.5% (w/v) potassium ferrocyanide for 1 h on ice, replaced by 1% (w/v)  
3 OsO<sub>4</sub> in sodium cacodylate 0.1 M for an additional hour. Samples were then dehydrated in  
4 series of ethanol and infiltrated with propylene oxide (Agar): Durcupan (Agar) (1:1) followed  
5 by Durcupan embedding for 48 h. Semi-thin sections were cut (500nm) and stained with  
6 toluidine blue to evaluate tissue morphology and select areas for ultrathin sectioning.  
7 Ultrathin sections (100 nm) were cut with Ultracut S microtome (Leica), counter-stained with  
8 lead citrate, and observed under a Tecnai G2 20 high-resolution transmission electron  
9 microscope (Fei Company, The Netherlands) at an operating voltage of 200kV. Images were  
10 digitally acquired at 3000-5000 X magnification by a charge-coupled device (CCD) camera  
11 using Digital Micrograph software (Gatan, Inc, USA).

## 12 **Image acquisition**

13 Photomicrographs were taken with a DS2-Ri2 color camera using NIS Element basic  
14 research software (NIKON Instruments, Japan). Fluorescence settings were optimized to  
15 achieve the best compromise between image quality and acquisition rate: 8-bit depth, 512 x  
16 512 frame size, x40 magnification, 200±20ms exposure time with 25.6X-32.2X analog gain,  
17 and 1 µm z-interval, with manual image acquisition at different depth. Images were acquired  
18 with a double filter block of FITC (green; excitation at 475-490nm; bandpass at 483CWL)  
19 and TRITC (red; excitation at 545-565nm; band-pass at 555CWL). Fluorescence images were  
20 then processed for maximum intensity projections of the z-stacks, using ImageJ software and  
21 the Binary Connectivity plugin (downloaded at <http://imagej.nih.gov/ij/>). For dye-based  
22 histological staining, we have used the same camera and software with autofocus function at  
23 x40 objective magnification at bright-field filter (color, bandpass 0-∞) and FIJI was used for  
24 analysis with 7-8 fields/animals and 4 animals/groups. TEM images were imaged in Tecnai  
25 G2-20 with digital micrograph software (Gatan Inc., USA).

## 1 **Measurement of neurotransmitter and its rate-limiting enzyme in soleus muscle**

2 To understand the structure-function relationship of the NMJ after 24 h sleep  
3 deprivation and recovery we have studied the level of ACh and its rate-limiting enzyme  
4 AChE in soleus muscle homogenate. For the same, we have isolated the soleus muscle from 5  
5 animals in each group immediately after the completion of the study by CO<sub>2</sub> concussion.  
6 Further, the sample was snap-frozen in liquid nitrogen and then homogenized with 10%  
7 (W/V) ice-cold 0.1M PBS (1X; 7.4 pH) using a homogenizer and emulsifier (Remi Inst.;  
8 India) in a customized sample holder. Then this processed sample was centrifuged at 10,000g  
9 at 4°C (Hermle, Germany) and the supernatant was aliquoted and preserved in -20°C until  
10 further use.

## 11 **Acetylcholine in soleus muscle**

12 We have used a colorimetric kit for ACh (Cat no. EACL-100; EnzyChom™,  
13 BioAssay Systems, USA), following the manufacturer protocol where at the final step  
14 spectroscopic reading was taken at 570 nm, followed by an incubation within working  
15 reagent for 30 min at room temperature. And concentration was calculated from the following  
16 formulae:

$$\text{Acetylcholine} = \frac{(\text{R}_{\text{sample}} - \text{R}_{\text{blank}})}{\text{Slope } (\mu\text{M}^{-1})} \times n$$

17  
18 Where R sample and R blank are optical/fluorescence intensity readings of the sample and  
19 H<sub>2</sub>O respectively, n is the sample dilution factor.

## 20 **Acetylcholinesterase in soleus muscle**

21 We have measured AChE with sandwiched ELISA (Cat no. ER0461; Fine Test, USA)  
22 technique. The manufacturer's protocol was followed for the ELISA and in the final step after  
23 the addition of stop solution, optical density was measured at 450 nm and the concentrations

1 of the unknown sample were calculated from the equation obtained from the standard curve  
2 drawn out of the six serial dilutions of the standard.

### 3 **Statistical analysis**

4 All the data for the various parameters were run through the Shapiro-Wilk normality  
5 test. Comparisons of the parametric variables within the three groups were done using one-  
6 way analysis of variance (ANOVA) followed by Bonferroni correction. The significant  
7 difference between the non-parametric data within the 3 groups was evaluated using the  
8 Kruskal-Wallis test followed by Dunn's post-hoc. Where we did not get any significance, we  
9 re-evaluated taking two independent groups individually, and have applied the Mann-  
10 Whitney U test. The statistical model used in the present study is following previous  
11 literature <sup>31,32</sup>. The intact and altered pre-synaptic mitochondrial status in the three groups of  
12 rats was analyzed using 2-way ANOVA followed by Bonferroni's multiple comparison tests.  
13 To decipher the role of neurochemical transmission with its structural correlate in NMJ in the  
14 24 h sleep deprived rats, we have performed Spearman's correlation between ACh and AChE  
15 with pre and postsynaptic morphovariables calculated from the electron microscopic  
16 examination. All statistical analyses were performed using Graph-Pad Prism 8 software. The  
17 significance threshold was set at  $p < 0.05$ .

## 18 **Results**

### 19 **Sleep-wake cycle during sleep deprivation and recovery sleep**

20 The time spent (%) in the different SW stages of the group I, II, and III rats is  
21 depicted in **Fig. 1.A**. There was a significant change in the AW ( $\chi^2=23.5$ ,  $p < 0.0001$ ), QW  
22 ( $\chi^2=19.7$ ,  $p < 0.0001$ ), S1 ( $\chi^2=10.2$ ,  $p=0.002$ ), S2 ( $\chi^2=23.1$ ,  $p < 0.0001$ ) and REM ( $\chi^2=19.6$ ,  
23  $p < 0.0001$ ) when compared between the three groups. The control rats spent  $54.7 \pm 6.3\%$  of  
24 their SW time in AW and  $1.6 \pm 0.5\%$  in QW; while a significant increase in AW was observed  
25 in group II rats ( $p=0.02$ ), which was significantly reduced when given a chance to recover

1 from sleep deprivation ( $p < 0.0001$ ). A significant increase in QW was seen in the group III  
2 when compared to group I ( $p < 0.001$ ) group II ( $p = 0.001$ ). During sleep deprivation, the time  
3 spent in S1 and S2 was significantly reduced to  $10.0 \pm 1.4\%$  ( $p = 0.0003$ ) and  $0.8 \pm 0.3\%$   
4 ( $p = 0.013$ ) respectively compared to group I. In the group III rats, significantly higher time  
5 was spent in S2, compared to group II ( $p < 0.0001$ ) rats. Though the time spent in REM sleep  
6 in group II ( $0.3 \pm 0.1\%$ ) was less compared to group I rats ( $2.5 \pm 0.8\%$ ), it did not reach  
7 significant threshold. Time spent in REM sleep ( $6.5 \pm 0.3\%$ ) was significantly increased in  
8 group III from group I ( $p = 0.04$ ) and II ( $p < 0.0001$ ).

### 9 **Histological changes in soleus muscle**

10 In order to understand the macrostructure of the soleus muscle after 24 h sleep  
11 deprivation, we performed hematoxylin and eosin staining on transverse section. In the group  
12 I animals, subjective observation of high magnification images show maintenance of  
13 fascicular architecture and minimal variation in size of fiber (**Fig. 1.B.i.a-b**), while in the  
14 group II rats there was presence of fibers with myophagocytosis (**Fig. 1.B.ii.a-b**).  
15 Furthermore, mild perimyseal inflammatory infiltrates were also noted in the group II rats. In  
16 the group III, we have observed few atrophic and angulated fibers with maintenance of  
17 fascicular architecture in the soleus muscle (**Fig. 1.B.iii.a-b**). These findings suggest a  
18 change in morphology of anti-gravity muscle i.e. soleus muscle after 24 h sleep deprivation.

### 19 **Histochemical assay for myofibrillar ATPase**

20 The photomicrographic representation of histochemical assay of the soleus muscle  
21 type I fiber obtained from the group I, II, and III rats are depicted in **Fig 1.C**. The cell counts  
22 were done on the stained images using Fiji (Image J) software (<http://imagej.nih.gov/ij>)<sup>33</sup>.  
23 Histometric analyses revealed an increase in the size and density of type I fibers in the group  
24 II compared to group I and III (**Fig 1.C.iv and v**). After 24 h sleep deprivation, there was a  
25 significant increase in area and perimeter of type I fibers compared to group I and III ( $F_{(1,1,$

1 4.5)=208.7,  $p<0.0001$ ). When compared between group II and III, there was a significant  
2 decrease in the area and perimeter of cells per field ( $p=0.03$ ) as shown in **Fig 1.C. iv and v**.  
3 Additionally, we also have found significant increase in density of type I fiber/field examined  
4 in group II compared to group I ( $p=0.0003$ ) and III ( $p= 0.0005$ ; **Fig 1.C.vi**). No significant  
5 changes were observed in wet weight of soleus muscle (**Fig. 1.D**) after 24 h sleep deprivation  
6 when compared to the group I and III ( $\chi^2= 4.63$ ,  $p= 0.094$ ).

### 7 **Immunohistochemistry of neuromuscular junction**

8 The presynaptic protein markers viz. neurofilament, synaptic vesicle, and  
9 synaptophysin are immunolabelled with 2H3, 2SV2, SYP respectively (green fluorescence).  
10 The postsynaptic AChR is immunolabelled with  $\alpha$ -BTX (red fluorescence). In the group I  
11 rats, the NMJs appeared as pretzel-like structures (**Fig 2. A.i**). In the group II rats, there were  
12 characteristic changes in the neurofilament (**Fig 2.A.ii**), which is further supported from  
13 neuromorphometric analysis (**Fig 3**).

14 At the postsynaptic level of the group II rats, there was an increase in the size of the  
15 endplate area of the AChR, and fragmentation of the pretzel-shaped structure of the NMJ  
16 (**Fig 2.A**). All these NMJ changes were partially restored after recovery sleep in the group III  
17 rats (**Fig 2.C**). At the pre and postsynaptic terminals of the NMJ of group II rats, there were  
18 structural and morphological changes in the size of synaptic vesicle when compared to the  
19 group I rats (**Fig 2.A**), which is further revealed from the neuro-morphometric analysis (**Fig**  
20 **3**).

### 21 **Neuro-morphometric changes at the presynaptic terminal of the neuromuscular** 22 **junction**

23 A significant increase in the nerve terminal area ( $F_{(1.4,5.4)}=19.7$ ,  $p=0.004$ ), was  
24 observed at the presynaptic level of the group II rats when compared to group I ( $p=0.02$ ). The  
25 nerve terminal area was significantly reduced in group III when compared to group II rats



1 (p=0.04) (**Fig 3.A.i**). There was a significant change in the axon diameter when compared  
2 between the three groups ( $F_{(1.0,4.3)}=16.4$ , p=0.01). An increased (p=0.04) axon diameter was  
3 observed in the group II rats when compared to the group I (**Fig 3.A.ii**). A significant  
4 difference in the number of nerve terminals was observed between the three groups  
5 ( $F_{(1.3,5.1)}=18.63$ , p=0.006). Further, Dunn's multiple comparison exhibited a significant  
6 increase in group II compared to group I (p=0.006) and III (p=0.02) as indicated in **Fig**  
7 **3.A.iii**. There was a significant increase (p=0.002) in the number of branch points between  
8 control and group II rats (**Fig 3.A.iv**). From **Fig 3.A.v** and **vi**, it is evident that the total  
9 branch length ( $\chi^2=10.3$ , p=0.0005) was increased in group II (p=0.02) compared to group I  
10 and III (p=0.008), and the average branch length ( $\chi^2=9.8$ , p=0.001) obtained from the group II  
11 rats was significantly more compared to the group I (p=0.01) and III (p=0.01) rats. A  
12 significant increase ( $F_{(1.6,6.3)}=7.4$ , p=0.03) in the complexity (%) of NMJ in the group II rats  
13 was observed when compared to the control rats (**Fig 3.A.vii**).

#### 14 **Neuro-morphometric changes at the post-synapse of the NMJ**

15 A significant change in the postsynaptic AChR area ( $\chi^2=10.8$ , p=0.0002) was  
16 observed between the group I versus II (p=0.01) and group II versus III (p=0.01) (**Fig 3.B.i**).  
17 Significant increase in the AChR perimeter ( $\chi^2=10.7$ , p=0.0002), endplate area ( $\chi^2=11.6$ ,  
18 p<0.0001), endplate perimeter ( $\chi^2=9.1$ , p=0.004) was observed in group II rats when  
19 compared to control (**Fig 3.B.ii-v**). Of these parameters, end-plate area and diameter did not  
20 show any significant change after sleep recovery when compared to the group I (**Fig 3.B iii,**  
21 **v**). A significant change was found in the average area of AChR cluster ( $\chi^2=10.8$ , p=0.0002)  
22 and synaptic contact ( $\chi^2=8.1$ , p=0.01) when compared between the three groups (**Fig 3.B. viii,**  
23 **xii**). There was a significant decrease ( $\chi^2=6.3$ , p=0.003) in the synaptic overlap when  
24 compared between the group I and III rats (**Fig 3.B.xi**).

#### 25 **Ultra-structural changes in the soleus muscle neuromuscular junction**

1 Transmission electron microscopic images of neuromuscular junction showing  
2 presynaptic (nerve terminal) and postsynaptic (covered by sarcolemma) in three experimental  
3 conditions is shown in **Fig. 4.Ai.-iii**. In the representative images we have shown a normal  
4 cristae in the mitochondria present at presynaptic compartment of control group as compared  
5 to that of 24 h sleep deprived and recovery sleep where we have observed swollen  
6 mitochondria in the presynaptic nerve terminal. In the recovery sleep we have observed  
7 glycogen droplets at the pre-synapse. Further, in order to detail these changes in terms of  
8 mitochondrial pool, synaptic vesicle pool and junctional folds we have performed  
9 morphometry on the images using image J as described previously<sup>34</sup>.

#### 10 **Mitochondrial pool**

11 There was a significant increase ( $\chi^2=13.02$ ,  $p<0.0476$ ) in the average diameter of pre-  
12 synaptic terminal mitochondria in group II compared to III ( $p=0.002$ ) (**Fig 4.B.i**). On  
13 applying the Mann-Whitney U test, we observed a significant increase in average diameter  
14 ( $U=28$ ,  $p=0.03$ ) and area ( $U=98$ ,  $p=0.04$ ) of post-synaptic mitochondria (**Fig 4.B.ii and v**),  
15 and also in the area of pre-synaptic mitochondria ( $U=70.5$ ,  $p=0.03$ ) of the group II versus the  
16 control rats (**Fig 4.B.iv**). The pre-synaptic ( $U=9.5$ ,  $p=0.01$ ) mitochondrial density was  
17 increased in group II rats compared to control (**Fig 4.B.iii**). The post-synaptic ( $\chi^2= 15.6$ ,  
18  $p=0.0004$ ) mitochondrial density was significantly altered between group I and II ( $p=0.003$ ),  
19 and also between group II and III ( $p=0.0012$ ) (**Fig 4.B.vi**).

20 A significant increase ( $F_{(1,12)}=112.7$ ,  $p<0.0001$ ) in the average diameter of altered and  
21 intact presynaptic mitochondria within the group I ( $p=0.0003$ ), II ( $p<0.0001$ ) and III rats  
22 ( $p=0.0002$ ) was observed (**Fig 4.D.i**). The average area of mitochondria of the presynaptic  
23 terminal was significantly increased ( $F_{(1,12)}=22.2$ ,  $p=0.0003$ ) between the altered and intact  
24 mitochondria in group I rats, and in group I (altered mitochondria) versus III (intact  
25 mitochondria) rats (**Fig 4.D.ii**). Significant change ( $F_{(1,15)}=39.8$ ,  $p<0.0001$ ) in the circularity

1 index of altered and intact mitochondria within group I ( $p=0.004$ ), II ( $p=0.03$ ) and III  
2 ( $p=0.003$ ) animals was also seen (**Fig 4.D.iii**).

### 3 **Synaptic vesicle**

4 The synaptic vesicle density (SVs/nm<sup>2</sup>) in the NMJ of group II rats was significantly  
5 increased ( $F_{(1,12)}=12.8$ ,  $p=0.002$ ) when compared to group I rats ( $p=0.0013$ ), and also between  
6 group I and III ( $p=0.002$ ) (**Fig 4.B.vii**). Docked synaptic vesicles, located within and beyond  
7 200 nm from the plasma membrane were analyzed as vesicles located within the active zone  
8 (AZ); no significant difference was found in vesicle distribution within the AZ of Group I, II,  
9 and III rats (**Fig 4.B.viii**).

### 10 **Junctional folds**

11 The number of junctional folds per synapse was significantly increased ( $\chi^2=11.9$ ,  
12  $p=0.0002$ ) between group I and II rats ( $p=0.03$ ) and between group II and III rats ( $p=0.004$ )  
13 (**Fig 4.C.i**). A significant increase in the average length of synaptic folds ( $\chi^2=19.5$ ,  $p<0.0001$ )  
14 between group I and II ( $p<0.0001$ ), and between group II and III rats ( $p=0.01$ ) is observed  
15 (**Fig 4.C.ii**). The average junctional fold area ( $\chi^2=21.3$ ,  $p<0.0001$ ) was significantly increased  
16 in the group II to control ( $p<0.0001$ ), and it was significantly decreased ( $p=0.02$ ) in group III  
17 compared to II rats (**Fig 4.C.iii**). The opening width of junctional folds ( $\chi^2=15.4$ ,  $p=0.0005$ )  
18 was significantly increased between group II compared to group I rats ( $p=0.0003$ ), and also  
19 between control and recovery sleep group rats ( $p=0.05$ ) (**Fig 4.C.iv**). The width of the  
20 synaptic cleft also showed significant alteration ( $\chi^2=15.4$ ,  $p=0.0004$ ), when compared  
21 between control and group II ( $p=0.002$ ), and between group II and III animals ( $p=0.002$ ; **Fig**  
22 **4.C.v**).

### 23 **Acetylcholine and Acetylcholine esterase concentrations**

24 The ACh concentration in the soleus muscle homogenate of the group II rats was  
25 significantly lowered compared to the control ( $\chi^2=7.7$ ,  $p=0.007$ ; **Fig 4.E.i**). When compared  
19

1 between group I, II, and III rats, there was a significant increase ( $\chi^2=9.3$ ,  $p=0.0005$ ) in AChE  
2 in the soleus muscle homogenate in the group II ( $p=0.03$ ) and III rats ( $p=0.03$ ) compared to  
3 control (**Fig 4.F.i**).

#### 4 **Correlation between neurotransmission and structural changes in NMJ of sleep** 5 **deprived rats**

6 In the group II rats, Spearman's correlation between ACh and different morphometric  
7 variables revealed a strong negative correlation ( $r$ ) with variables like average diameter of  
8 post-synaptic mitochondria ( $r=-0.8$ ,  $p=0.33$ ); average area of post-synaptic mitochondria ( $r=-$   
9  $0.6$ ,  $p=0.41$ ); density of pre-synaptic mitochondria ( $r=-1.0$ ,  $p=0.08$ ); width of synaptic cleft  
10 ( $r=-0.8$ ,  $p=0.33$ ). On contrary, ACh had positive correlation with density of post-synaptic  
11 mitochondria ( $r=0.8$ ,  $p=0.33$ ); opening width ( $r=0.8$ ,  $p=0.33$ ) of the NMJ of group II rats (**Fig**  
12 **4.E.ii**). While AChE showed a strong negative correlation with density of post-synaptic  
13 mitochondria ( $r=-0.6$ ;  $p=0.41$ ), junctional fold opening width ( $r=-1.00$ ;  $p=0.08$ ) and positive  
14 correlation with variables like average diameter of post-synaptic mitochondria ( $r=0.60$ ;  
15  $p=0.41$ ), average area of post-synaptic mitochondria ( $r=0.80$ ;  $p=0.33$ ), density of pre-synaptic  
16 mitochondria ( $r=0.80$ ;  $p=0.33$ ), width of synaptic cleft ( $r=0.60$ ;  $p=0.41$ ) of the 24 h sleep  
17 deprived rats (**Fig. 4.F.ii**).

#### 18 **Discussion**

19 Macrostructural examination of haematoxylin and eosin stained soleus muscle  
20 sections in rats subjected to 24 h sleep deprivation, reflected abnormality in fascicular  
21 architecture of myofibers compared to the two other groups. These changes were  
22 accompanied by mild variation in fiber size and myophagocytosis after 24 h sleep  
23 deprivation. Even after recovery sleep few atrophic and angulated fibers persisted.  
24 Previously, the endocrine correlates of muscle protein synthesis during sleep deprivation have  
25 been documented <sup>35</sup>. The sleep deprivation protocol used in this study was similar to us,  
20

1 where loss of muscle mass, cross sectional area of tibialis anterior muscle was reported, and it  
2 was associated with increase in corticosterone and decrease in testosterone of serum samples  
3 after sleep deprivation<sup>35</sup>. Further, the authors have hypothesized that sleep restriction inhibits  
4 anabolic hormone secretion and facilitates catabolic hormones promoting protein degradation  
5 over synthesis causing muscle wasting<sup>36</sup>. However, in these studies authors did not comment  
6 about the muscle hormone levels. Besides this, in our study, there was an increase in the  
7 area/field, perimeter and the density of the oxidative fibers (type I) of the soleus muscle in 24  
8 h sleep deprived rats compared to the control. When the rats were allowed to recover from  
9 sleep deprivation, the area/field, perimeter and density of the type I fibers were restored as  
10 compared to the sleep deprivation. Souza et al., have shown that there were no differences in  
11 the area of myosin ATPase activity of gastrocnemius muscle type I fibers when compared  
12 between normal and 96 h REM sleep deprived rats, while a reduced area was observed in the  
13 type IIa fibers<sup>37</sup>. Moreover, 96 h sleep deprivation in male Wistar EPM-1 rats showed  
14 histopathological changes which confer that chronic sleep deprivation causes DNA damage,  
15 lipid peroxidation, and lysosomal activity prominently expressed in soleus muscle and not in  
16 plantar muscle. However, muscle mass was increased in soleus and reduced in plantar muscle  
17 of sleep deprived rats when compared to control<sup>38</sup>. This observation suggests a differential  
18 effect depending upon the muscle type studied. This study was conducted in Wistar EPM-1  
19 rats, and there were no sleep recovery group. The difference observed in our present study  
20 with the previous report could be due to the difference in the muscle type and the duration of  
21 sleep deprivation.

22 With the multiple platform method for sleep deprivation, we were able to increase the  
23 active and quiet wakefulness of the rats<sup>27,28</sup>. When the rats were allowed to recover from  
24 sleep deprivation, AW time was significantly decreased, while the percentage of time spent in  
25 SWS and REM was significantly increased. Few brief sleep bouts were still observed during

1 sleep deprivation, which could be due to increased sleep drive in the rats making them fall  
2 asleep<sup>39,40</sup>.

3 From our immunofluorescence data, it was observed that 24 h sleep deprivation  
4 caused amplification of presynaptic nerve terminal branching at the soleus muscle NMJ when  
5 compared to control rats. Similarly, the postsynaptic end-plate morphology along with the  
6 AChR area was increased in the NMJ of 24 h sleep deprived rats. These morphological  
7 changes were further supported by TEM findings, where the synaptic vesicle density,  
8 junctional fold morphology along with changes in a synaptic mitochondrial pool indicate that  
9 acute sleep deprivation for 24 h causes morphological changes at the peripheral synapse.  
10 Interestingly, in the 24 h sleep deprived rat, the biochemical estimation of ACh was lowered,  
11 while the concentration of its hydrolyzing enzyme (AChE) was higher. All these  
12 morphological and biochemical changes were reversed in rats allowed to recover from acute  
13 sleep deprivation. In a previous study by Gilestro et al., (2009), short period of sleep  
14 deprivation/ waking (6,12, 24 h) caused brain synaptic strengthening in the male *Drosophila*  
15 <sup>5</sup>. In this study the association between sleep and synaptic plasticity was explored using  
16 multiple cue-based (viz. tactile, audio, and visual stimuli) sleep deprivation protocol. This  
17 deprivation protocol itself can be a cause for plastic changes found in the study. More so,  
18 though confocal microscopy was performed to confirm the specific brain region involved in  
19 the same, mainly the protein expression by Western blot of whole brain homogenates was  
20 used in this study<sup>5</sup>.

21 Differences in the size, appearance, and complexity of both pre and postsynaptic  
22 structures are observed from immunofluorescence. At the presynaptic level of 24 h sleep  
23 deprived rats, we have observed increased axonal diameters, axonal perimeters, increased  
24 branch number, total and average length per branch resulting in greater branching  
25 complexity. These were coupled with postsynaptic changes in the end-plate area, diameter,  
22

1 and perimeter lengths. The contribution of the skeletal muscle to NMJ formation during  
2 development and re-innervation has been reported previously<sup>41</sup>. Accordingly, the plastic  
3 changes of NMJs in the trained neuromuscular context include adaptations in endplate size,  
4 the sprouting of nerve terminal branches, and electrophysiological kinetics<sup>42,43</sup>. These  
5 previous reports along with our findings point to activity-dependent changes in NMJ  
6 morphology and function.

7 Ultrastructural examinations of NMJ in our study revealed a significant increase in the  
8 13 morphometric parameters from pre and postsynaptic junctional sites of 24 h sleep  
9 deprived rats. These include structures viz. mitochondria, synaptic vesicle, basal lamina, and  
10 junctional folds. These findings indicate that there is possible structural remodeling of NMJ  
11 in the acutely sleep deprived rats causing anatomical changes to combat 24 h sleep  
12 deprivation induced possible energy debt. This could be due to either diurnal rhythmicity of  
13 NMJ<sup>44</sup>, or due to activity-dependent plasticity<sup>22,42,43</sup>. In the study by Mehnert et al., the effect  
14 of light and dark phase on NMJ though tracing of motor neuron injected with HP in mutant  
15 *Drosophila* mutation in *tim* and *per* gene was observed. Morphological analysis showed that  
16 motor terminal morphology had a rhythmic pattern for day and night, which was linked with  
17 the clock genes<sup>44</sup>.

18 We have also observed alteration in the pre and postsynaptic mitochondrial status at  
19 the NMJ, which is further correlated with the regulation of synaptic vesicle release<sup>45,46</sup>.  
20 Altered presynaptic mitochondrial morphology was observed in the control and sleep  
21 deprived rats. Ruggiero et al., showed that the SW cycle affects the activity of certain  
22 mitochondrial enzymes which in turn regulate the mean firing rate of cortical and  
23 hippocampal neurons<sup>47</sup>. Inference from our TEM data further shed light on the link between  
24 the NMJ mitochondrial status and the SW cycle. Along with the synaptic mitochondrial

1 morphology, there was also an increase in the synaptic vesicle density in the 24 h sleep  
2 deprived rats compared to the control.

3         Recently Cirelli and Tononi showed the effect of the SW cycle on the synaptic  
4 ultrastructure of the cerebrum and hippocampus. It was found through scanning electron  
5 microscopy that SW significantly influenced synaptic morphology which is correlated with  
6 the efficacy of AMPA receptors<sup>3</sup>. The expression of GluR1-containing AMPA receptors as  
7 an indicator of synaptic strength in the cortex and hippocampus was 30-40% higher after  
8 wakefulness in rats<sup>10</sup>. Similar to glutamate in the CNS, ACh is the principal neurotransmitter  
9 at the NMJ<sup>45</sup>. We have observed neuro-morphometric quantification of postsynaptic  
10 endplates of soleus muscles depicting significant changes in ACh area and perimeter,  
11 endplate area and perimeter, and in the number of ACh clusters after 24 h sleep deprivation  
12 when compared to control. Further, biochemical assessment of pre and postsynaptic  
13 neurotransmitters showed a reduction in the ACh and increased AChE concentration in the  
14 soleus muscle homogenate of 24 h sleep deprived rats. This shows the termination of synaptic  
15 transmission in the postsynapse conferring a functional upscaling of NMJ<sup>45</sup>. Moreover, we  
16 found a muscular adaptation to endurance after acute sleep deprivation through slow-twitch  
17 muscle conversion. Ultra-structural alterations in the increased area of the junctional fold and  
18 the width of the synaptic cleft are also evident from our TEM data. Increased junctional fold  
19 area increases muscle surface area allowing to hold more ACh<sup>45</sup>. Moreover, we have  
20 observed widening of the synaptic cleft, which is filled with extracellular matrix called  
21 synaptic basal lamina containing AChE<sup>45,48</sup>. These correlated structural findings with  
22 biochemical quantification of AChE, imply increased demand of neuromuscular transmission  
23 at the NMJ during 24 h sleep deprivation.

24         With the reduced consumption of energy by synaptic transmission during  
25 hyperpolarized down states, SWS represents an elective time for brain cells to carry out many  
24



1 housekeeping functions, including protein translation, the replenishment of calcium in  
2 presynaptic pools, the replenishment of glutamate vesicles, the recycling of membranes, the  
3 resting of mitochondria<sup>2,49-51</sup>, and the metabolite clearance from the extracellular space<sup>52</sup>.  
4 Recently we have reported that the muscle temperature was least altered during the normal  
5 SW cycle in rats, indicating that probably the muscle atonia during REM sleep provides a  
6 conducive environment for the muscle to rest and repair<sup>14</sup>, somewhat similar to slow-wave  
7 activity during SWS for CNS synaptic remodeling.

8         The correlation between ACh with synaptic morphological variables in our study  
9 suggests that acute sleep deprivation for 24 h causes neuromuscular changes in synaptic  
10 energy homeostasis though pre and postsynaptic mitochondrial modification respectively for  
11 vesicular transport and postsynaptic currents<sup>46,53</sup>. There was an additional change in the  
12 alignment of two synaptic compartments via thickening of the basal lamina to compensate for  
13 the loss of ACh in soleus muscle in the 24 h sleep deprived rats. The correlation between  
14 AChE with various NMJ structures reveal that the pre and postsynaptic homeostasis is altered  
15 along with junctional matrix alignment leading to the expression of more AChE, which  
16 terminates synaptic transmission by hydrolyzing ACh<sup>45</sup>. Furthermore, correlating the  
17 morphometric variables with neurotransmitter concentration also exhibited a similar heat-  
18 map revealing a structural remodeling in the NMJ after acute sleep deprivation, which is  
19 probably due to the energy balance in the synapse closely associated with the neuromuscular  
20 transmission<sup>54</sup>.

21         The NMJ is a complex structure that mediates the cross-talk between motor neurons  
22 and muscle fibers<sup>23,45</sup>. Muscle is the other excitable tissue besides neurons and the NMJ is the  
23 most studied structure for synaptic physiology. Effective neurotransmission depends upon the  
24 regular arrangement of postsynaptic AChs and proper alignment between the terminal bouton  
25 and underlying motor endplate<sup>23</sup>. The outcome of our study suggests substantial remodeling

1 of the NMJ during acute sleep deprivation and after recovery sleep. These changes reflect  
2 plasticity at both pre and postsynaptic structures of NMJ, and indicate at possible correlation  
3 to neuromuscular transmission and muscle function. Our findings provide strong evidence for  
4 the first time on the influence of sleep on the muscle and neuromuscular junction morphology  
5 and functions.

#### 6 **Data Availability:**

7 Details of materials and experimental protocols, the sources and catalogue numbers of  
8 reagents necessary for replication of the study are included in the manuscript. All raw data  
9 are deposited in the centre for open science and can be accessed from the following link:  
10 ([https://mfr.osf.io/render?url=https://osf.io/f29n3/?direct%26mode=render%26action=downl](https://mfr.osf.io/render?url=https://osf.io/f29n3/?direct%26mode=render%26action=download%26mode=render)  
11 [oad%26mode=render](https://mfr.osf.io/render?url=https://osf.io/f29n3/?direct%26mode=render%26action=download%26mode=render)).

#### 12 **Acknowledgements:**

13 This work was supported by the All India Institute of Medical Sciences, New Delhi and the  
14 Indian Council of Medical Research, New Delhi (45/6/2019/PHY/BMS). We want to extend  
15 our acknowledgement to Dr. M.C Sharma and Dr Soumya Sahu from Department of  
16 Pathology, and Dr. Shivam Pandey, Department of Biostatistics, All India Institute of  
17 Medical Sciences, New Delhi for re-evaluation of histopathological data and statistical results  
18 respectively.

#### 19 **Conflict of interest:**

20 The authors declare no conflict of interest.

#### 21 **Author contributions:**

22 B.S., A.R., H.N.M., N.A., and R.N. designed research; B.S., A.R., L.C. performed research;  
23 B.S., A.R and T.S.G. analyzed data; A.S., T.C.N., contributed to transmission electron  
24 microscopy facility; B.S., A.R and T.S.G. wrote the paper; and B.S., A.R., T.S.G., H.N.M.,  
25 performed critical drafting of the manuscript.

## 1 Reference

- 2 1. *National Sleep Foundation*. Washington, DC 20005.; 2002.
- 3 2. Cirelli C, Gutierrez CM, Tononi G. Extensive and Divergent Effects of Sleep and  
4 Wakefulness on Brain Gene Expression. *Neuron*. 2004;41(1):35-43.  
5 doi:10.1016/S0896-6273(03)00814-6
- 6 3. Cirelli C, Tononi G. Effects of sleep and waking on the synaptic ultrastructure.  
7 *Philos Trans R Soc B Biol Sci*. 2020;375(1799):20190235.  
8 doi:10.1098/rstb.2019.0235
- 9 4. de Vivo L, Bellesi M, Marshall W, et al. Ultrastructural evidence for synaptic  
10 scaling across the wake/sleep cycle. *Science*. 2017;355(6324):507-510.  
11 doi:10.1126/science.aah5982
- 12 5. Gilestro GF, Tononi G, Cirelli C. Widespread Changes in Synaptic Markers as a  
13 Function of Sleep and Wakefulness in *Drosophila*. *Science*. 2009;324(5923):109-  
14 112. doi:10.1126/science.1166673
- 15 6. Meerlo P, Mistlberger RE, Jacobs BL, Craig Heller H, McGinty D. New neurons in  
16 the adult brain: The role of sleep and consequences of sleep loss. *Sleep Med Rev*.  
17 2009;13(3):187-194. doi:10.1016/j.smrv.2008.07.004
- 18 7. Tung A, Takase L, Fornal C, Jacobs B. Effects of sleep deprivation and recovery  
19 sleep upon cell proliferation in adult rat dentate gyrus. *Neuroscience*.  
20 2005;134(3):721-723. doi:10.1016/j.neuroscience.2005.06.008
- 21 8. Stickgold R. Sleep-dependent memory consolidation. *Nature*. 2005;437(7063):1272-  
22 1278. doi:10.1038/nature04286

- 1    **9. Huber R, Felice Ghilardi M, Massimini M, Tononi G. Local sleep and learning.**  
2        *Nature*. 2004;430(6995):78-81. doi:10.1038/nature02663
- 3    **10. Vyazovskiy VV, Cirelli C, Pfister-Genskow M, Faraguna U, Tononi G. Molecular**  
4        **and electrophysiological evidence for net synaptic potentiation in wake and**  
5        **depression in sleep. *Nat Neurosci*. 2008;11(2):200-208. doi:10.1038/nn2035**
- 6    **11. Walker M. *Why We Sleep: The New Science of Sleep and Dreams*. Penguin Random**  
7        **House; 2017.**
- 8    **12. Anafi RC, Pellegrino R, Shockley KR, Romer M, Tufik S, Pack AI. Sleep is not just**  
9        **for the brain: transcriptional responses to sleep in peripheral tissues. *BMC***  
10        ***Genomics*. 2013;14(1):362. doi:10.1186/1471-2164-14-362**
- 11   **13. Mignot E. Why We Sleep: The Temporal Organization of Recovery. *PLoS Biol*.**  
12        **2008;6(4):e106. doi:10.1371/journal.pbio.0060106**
- 13   **14. Sharma B, Sengupta T, Chandra Vishwakarma L, Akhtar N, Mallick HN. Muscle**  
14        **temperature is least altered during total sleep deprivation in rats. *J Therm Biol*.**  
15        **March 2021:102910. doi:10.1016/j.jtherbio.2021.102910**
- 16   **15. Riedel BW, Lichstein KL. Insomnia and daytime functioning. *Sleep Med Rev*.**  
17        **2000;4(3):277-298. doi:10.1053/smr.1999.0074**
- 18   **16. Moul DE, Nofzinger EA, Pilkonis PA, Houck PR, Miewald JM, Buysse DJ.**  
19        **Symptom reports in severe chronic insomnia. *Sleep*. 2002;25(5):553-563.**

- 1 17. Roth T, Ancoli-Israel S. Daytime consequences and correlates of insomnia in the  
2 United States: results of the 1991 National Sleep Foundation Survey. II. *Sleep*.  
3 1999;22 Suppl 2:S354-358.
- 4 18. Aaronson LS, Pallikkathayil L, Crighton F. A Qualitative Investigation of Fatigue  
5 among Healthy Working Adults. *West J Nurs Res*. 2003;25(4):419-433.  
6 doi:10.1177/0193945903025004007
- 7 19. Aaronson LS, Teel CS, Cassmeyer V, et al. Defining and Measuring Fatigue. *Image*  
8 *J Nurs Sch*. 1999;31(1):45-50. doi:10.1111/j.1547-5069.1999.tb00420.x
- 9 20. Jouvet M. Neurophysiology of the states of sleep. *Physiol Rev*. 1967;47(2):117-177.  
10 doi:10.1152/physrev.1967.47.2.117
- 11 21. Chase MH, Morales FR. Subthreshold Excitatory Activity and Motoneuron  
12 Discharge During REM Periods of Active Sleep. *Science*. 1983;221(4616):1195-  
13 1198. doi:10.1126/science.6310749
- 14 22. Newman ZL, Hoagland A, Aghi K, et al. Input-Specific Plasticity and Homeostasis  
15 at the Drosophila Larval Neuromuscular Junction. *Neuron*. 2017;93(6):1388-  
16 1404.e10. doi:10.1016/j.neuron.2017.02.028
- 17 23. Shi L, Fu AKY, Ip NY. Molecular mechanisms underlying maturation and  
18 maintenance of the vertebrate neuromuscular junction. *Trends Neurosci*.  
19 2012;35(7):441-453. doi:10.1016/j.tins.2012.04.005
- 20 24. *Guide for the Care and Use of Laboratory Animals: Eighth Edition*. Washington,  
21 D.C.: National Academies Press; 2011. <http://www.nap.edu/catalog/12910>.  
22 Accessed September 24, 2020.

- 1 25. De Groot J. *The Rat Forebrain in Stereotaxic Co-Ordinates*. Treatises of the Royal  
2 Dutch Academy of Sciences. London.: North Holland Publishing  
3 Company,Amsterdam; 1959.
- 4 26. John J, Mohan Kumar V, Gopinath G, Ramesh V, Mallick H. Changes in Sleep-  
5 Wakefulness after Kainic Acid Lesion of the Preoptic Area in Rats. *Jpn J Physiol*.  
6 1994;44(3):231-242. doi:10.2170/jjphysiol.44.231
- 7 27. Machado RB, Hipólido DC, Benedito-Silva AA, Tufik S. Sleep deprivation induced  
8 by the modified multiple platform technique: quantification of sleep loss and  
9 recovery. *Brain Res*. 2004;1004(1-2):45-51. doi:10.1016/j.brainres.2004.01.019
- 10 28. Suchecki D, Duarte Palma B, Tufik S. Sleep rebound in animals deprived of  
11 paradoxical sleep by the modified multiple platform method. *Brain Res*.  
12 2000;875(1-2):14-22. doi:10.1016/S0006-8993(00)02531-2
- 13 29. Srividya R, Mallick HN, Kumar VM. Changes in brain temperature and  
14 thermoregulation produced by destruction of medial septal neurons in rats. *Brain*  
15 *Res Bull*. 2005;66(2):143-148. doi:10.1016/j.brainresbull.2005.04.008
- 16 30. Jones RA, Reich CD, Dissanayake KN, et al. NMJ-morph reveals principal  
17 components of synaptic morphology influencing structure–function relationships  
18 at the neuromuscular junction. *Open Biol*. 2016;6(12):160240.  
19 doi:10.1098/rsob.160240
- 20 31. Eacret D, Lemchi C, Caulfield JI, Cavigelli SA, Veasey SC, Blendy JA. Chronic  
21 Sleep Deprivation Blocks Voluntary Morphine Consumption but Not Conditioned  
22 Place Preference in Mice. *Front Neurosci*. 2022;16. doi:10.3389/fnins.2022.836693

- 1   **32. Konakanchi S, Raavi V, MI HK, Shankar MS V. Effect of chonic sleep deprivation**  
2       **and sleep recovery on hippocampal CA3 neurons, spatial memory and anxiety-like**  
3       **behavior in rats. *Neurobiol Learn Mem.* 2022;187:107559.**  
4       **doi:10.1016/j.nlm.2021.107559**
- 5   **33. Schindelin J, Arganda-Carreras I, Frise E, et al. Fiji: an open-source platform for**  
6       **biological-image analysis. *Nat Methods.* 2012;9(7):676-682. doi:10.1038/nmeth.2019**
- 7   **34. Spendiff S, Howarth R, McMacken G, et al. Modulation of the Acetylcholine**  
8       **Receptor Clustering Pathway Improves Neuromuscular Junction Structure and**  
9       **Muscle Strength in a Mouse Model of Congenital Myasthenic Syndrome. *Front***  
10      ***Mol Neurosci.* 2020;13. doi:10.3389/fnmol.2020.594220**
- 11   **35. Dattilo M, Antunes HKM, Medeiros A, et al. Paradoxical sleep deprivation induces**  
12      **muscle atrophy. *Muscle Nerve.* 2012;45(3):431-433. doi:10.1002/mus.22322**
- 13   **36. Dattilo M, Antunes HKM, Medeiros A, et al. Sleep and muscle recovery:**  
14      **Endocrinological and molecular basis for a new and promising hypothesis. *Med***  
15      ***Hypotheses.* 2011;77(2):220-222. doi:10.1016/j.mehy.2011.04.017**
- 16   **37. de Sá Souza H, Antunes HKM, Dáttilo M, et al. Leucine supplementation is anti-**  
17      **atrophic during paradoxical sleep deprivation in rats. *Amino Acids.***  
18      **2016;48(4):949-957. doi:10.1007/s00726-015-2142-7**
- 19   **38. Mônico-Neto M, Lee KS, da Luz MHM, et al. Histopathological changes and**  
20      **oxidative damage in type I and type II muscle fibers in rats undergoing**  
21      **paradoxical sleep deprivation. *Cell Signal.* 2021;81:109939.**  
22      **doi:10.1016/j.cellsig.2021.109939**

- 1   **39. Dispersyn G, Sauvet F, Gomez-Merino D, et al. The homeostatic and circadian**  
2       **sleep recovery responses after total sleep deprivation in mice. *J Sleep Res.***  
3       **2017;26(5):531-538. doi:10.1111/jsr.12541**
- 4   **40. Vishwakarma LC, Sharma B, Singh V, Jaryal AK, Mallick HN. Acute sleep**  
5       **deprivation elevates brain and body temperature in rats. *J Sleep Res.* April 2020.**  
6       **doi:10.1111/jsr.13030**
- 7   **41. Tintignac LA, Brenner H, Rüegg MA. Mechanisms Regulating Neuromuscular**  
8       **Junction Development and Function and Causes of Muscle Wasting. *Physiol Rev.***  
9       **2015;95(3):809-852. doi:10.1152/physrev.00033.2014**
- 10   **42. Deschenes MR, Roby MA, Glass EK. Aging influences adaptations of the**  
11       **neuromuscular junction to endurance training. *Neuroscience.* 2011;190:56-66.**  
12       **doi:10.1016/j.neuroscience.2011.05.070**
- 13   **43. Valdez G, Tapia JC, Kang H, et al. Attenuation of age-related changes in mouse**  
14       **neuromuscular synapses by caloric restriction and exercise. *Proc Natl Acad Sci.***  
15       **2010;107(33):14863-14868. doi:10.1073/pnas.1002220107**
- 16   **44. Mehnert KI, Beramendi A, Elghazali F, Negro P, Kyriacou CP, Cantera R.**  
17       **Circadian changes in *Drosophila* motor terminals. *Dev Neurobiol.* 2007;67(4):415-**  
18       **421. doi:10.1002/dneu.20332**
- 19   **45. Nishimune H, Shigemoto K. Practical Anatomy of the Neuromuscular Junction in**  
20       **Health and Disease. *Neurol Clin.* 2018;36(2):231-240. doi:10.1016/j.ncl.2018.01.009**



- 1 46. Vos M. Synaptic mitochondria in synaptic transmission and organization of vesicle  
2 pools in health and disease. *Front Synaptic Neurosci.* 2010;2.  
3 doi:10.3389/fnsyn.2010.00139
- 4 47. Ruggiero A, Katsenelson M, Slutsky I. Mitochondria: new players in homeostatic  
5 regulation of firing rate set points. *Trends Neurosci.* 2021;44(8):605-618.  
6 doi:10.1016/j.tins.2021.03.002
- 7 48. Rodríguez Cruz PM, Cossins J, Beeson D, Vincent A. The Neuromuscular Junction  
8 in Health and Disease: Molecular Mechanisms Governing Synaptic Formation and  
9 Homeostasis. *Front Mol Neurosci.* 2020;13. doi:10.3389/fnmol.2020.610964
- 10 49. Mackiewicz M, Shockley KR, Romer MA, et al. Macromolecule biosynthesis: a key  
11 function of sleep. *Physiol Genomics.* 2007;31(3):441-457.  
12 doi:10.1152/physiolgenomics.00275.2006
- 13 50. Mongrain V, Hernandez SA, Pradervand S, et al. Separating the Contribution of  
14 Glucocorticoids and Wakefulness to the Molecular and Electrophysiological  
15 Correlates of Sleep Homeostasis. *Sleep.* 2010;33(9):1147-1157.  
16 doi:10.1093/sleep/33.9.1147
- 17 51. Vyazovskiy VV, Harris KD. Sleep and the single neuron: the role of global slow  
18 oscillations in individual cell rest. *Nat Rev Neurosci.* 2013;14(6):443-451.  
19 doi:10.1038/nrn3494
- 20 52. Xie L, Kang H, Xu Q, et al. Sleep Drives Metabolite Clearance from the Adult  
21 Brain. *Science.* 2013;342(6156):373-377. doi:10.1126/science.1241224

1   **53. Lee CW, Peng HB. The Function of Mitochondria in Presynaptic Development at**  
2       **the Neuromuscular Junction. Pollard T, ed. *Mol Biol Cell*. 2008;19(1):150-158.**  
3       **doi:10.1091/mbc.e07-05-0515**

4   **54. Chi WL, Peng HB. The function of mitochondria in presynaptic development at**  
5       **the neuromuscular junction. *Mol Biol Cell*. 2008;19(1). doi:10.1091/mbc.E07-05-**  
6       **0515**

7

8

## 1 Figure legends

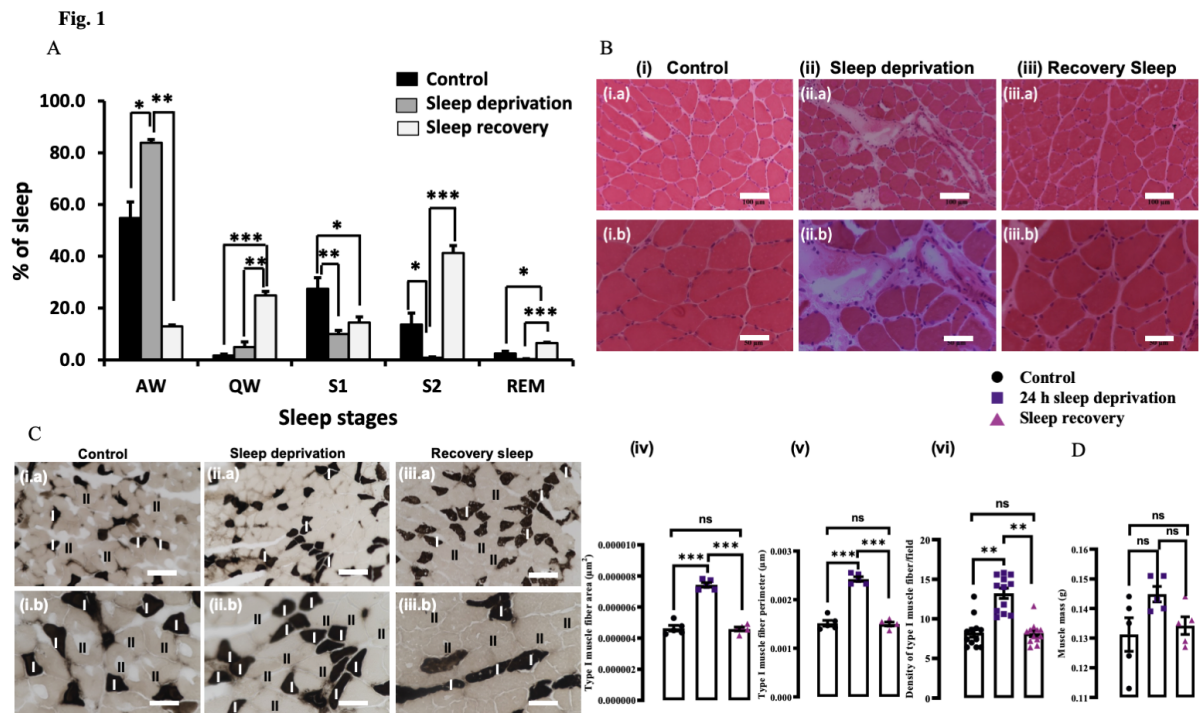

2  
3 **Figure 1: Sleep and sleep deprivation affecting histological changes in soleus muscle of**  
4 **male Wistar rats.**

5 (A) Percentage of various sleep stages (%) across the 24 h duration recorded from male  
6 Wistar rats (n=30). Recording of sleep-wake parameters during the control, 24 h sleep  
7 deprivation, and sleep recovery are shown. The asterisk denotes statistically significant  
8 differences (\*p<0.05, \*\*p<0.005, \*\*\*p<0.0005) between control (■) sleep deprivation (■),  
9 and sleep recovery (□) as revealed from the Kruskal-Wallis test followed by Dunn's multiple  
10 comparison test. AW: active wake; QW: quiet wake; S1: light slow-wave sleep; S2: deep  
11 slow-wave sleep; REM: rapid eye movement sleep; (B) Haematoxylin and eosin staining for  
12 histology of the transverse section of the soleus muscle delineating the changes observed only  
13 in sleep deprivation group compared to other in (a) low (20X) and (b) high magnification  
14 (40X) in (i) control, (ii) 24 h sleep deprivation, (iii) recovery sleep; (C) Comparative myosin  
15 ATPase staining of transverse section of soleus muscle appearing type I fiber darker than type

1 II is marked as 'I' and 'II' in (i) control, (ii) 24 h sleep deprivation, (iii) recovery sleep with  
2 low (20X) and high (40X) magnification; this was further quantified in FIJI showing area,  
3 perimeter, density of type I (iv-vi.) fiber in rats with normal sleep (n=6, indicated by ●), 24 h  
4 sleep deprivation (n=6, indicated by ■) and recovery sleep (n=6, indicated by ▲); soleus  
5 muscle mass (D.); the statistically significant values are represented as \* after applying one-  
6 way ANOVA followed by Bonferroni post-hoc test. \*\*\* represents  $p = 0.0006$  and \*\*\*\*  
7 represents  $p < 0.0001$ ; data is represented as mean  $\pm$  SEM showing individual data-points  
8 (n=6/ group); scale bar=100 $\mu$ m in 20X and 50 $\mu$ m in 40X.

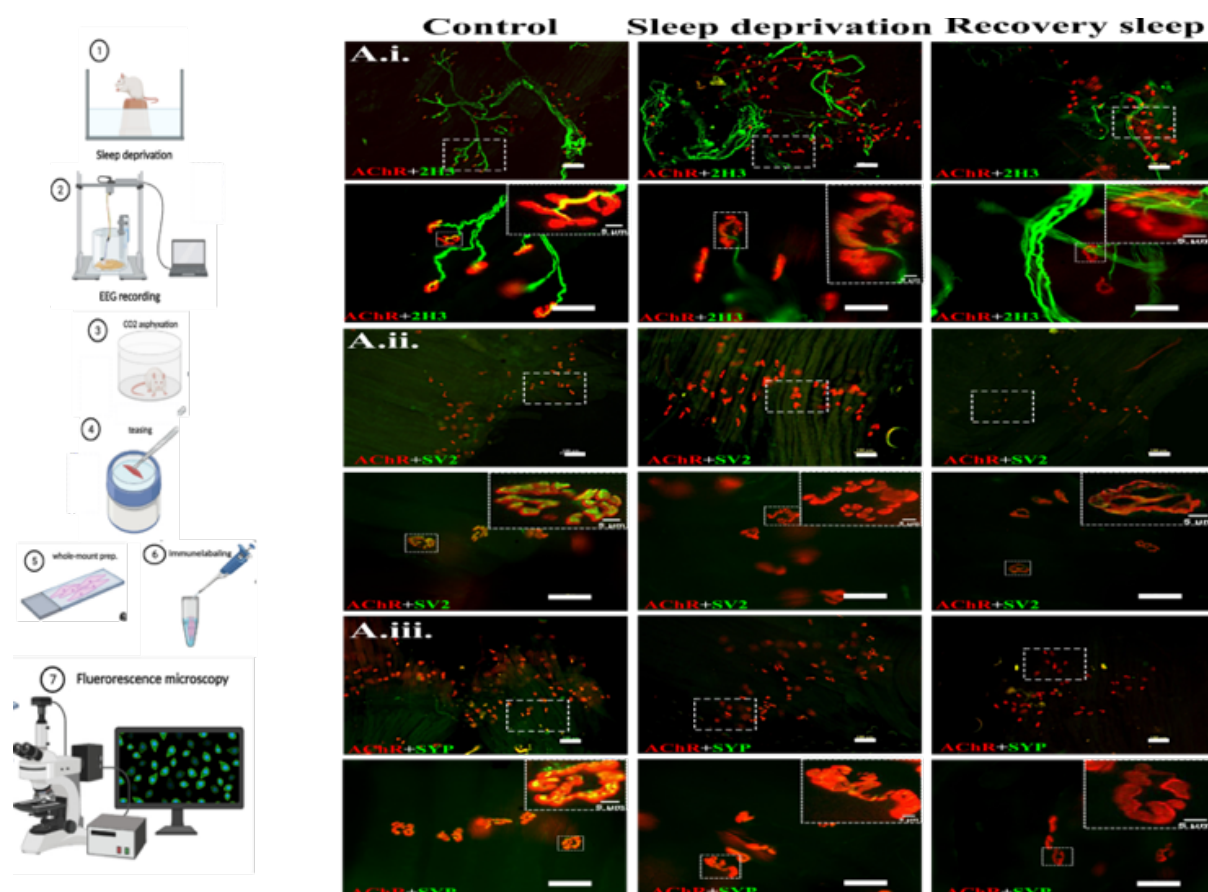

9  
10 **Figure 2: Immunofluorescence images of neuromuscular junctions of three different**  
11 **presynaptic markers colocalized with acetylcholine receptor**

12 Whole-mount preparation and imaging work-flow illustration (made using BioRender); (A.i)  
13 panel showing ACh+2H3 signals at low and high magnification of control, 24 h sleep  
14 deprivation and recovery sleep with zoomed NMJ (a-f.), (A.ii) panel shows ACh+SV2

1 signals at low and high magnification of control, 24 h sleep deprivation and recovery sleep  
 2 with zoomed NMJ (a-f.), (A.iii) panel showing ACh+SYP signals at low and high  
 3 magnification of control, 24 h sleep deprivation and recovery sleep with zoomed NMJ (a-f.)  
 4 in soleus muscle whole-mount preparations. The postsynaptic marker (ACh) is in red and the  
 5 presynaptic markers (2H3, SV2, SYP) are in green. Single NMJ is magnified in the inset  
 6 (scale bar= 5 $\mu$ m) of high magnification images; Scale bar=100 $\mu$ m in low (20X) and 50 $\mu$ m in  
 7 high (40X) magnification images.

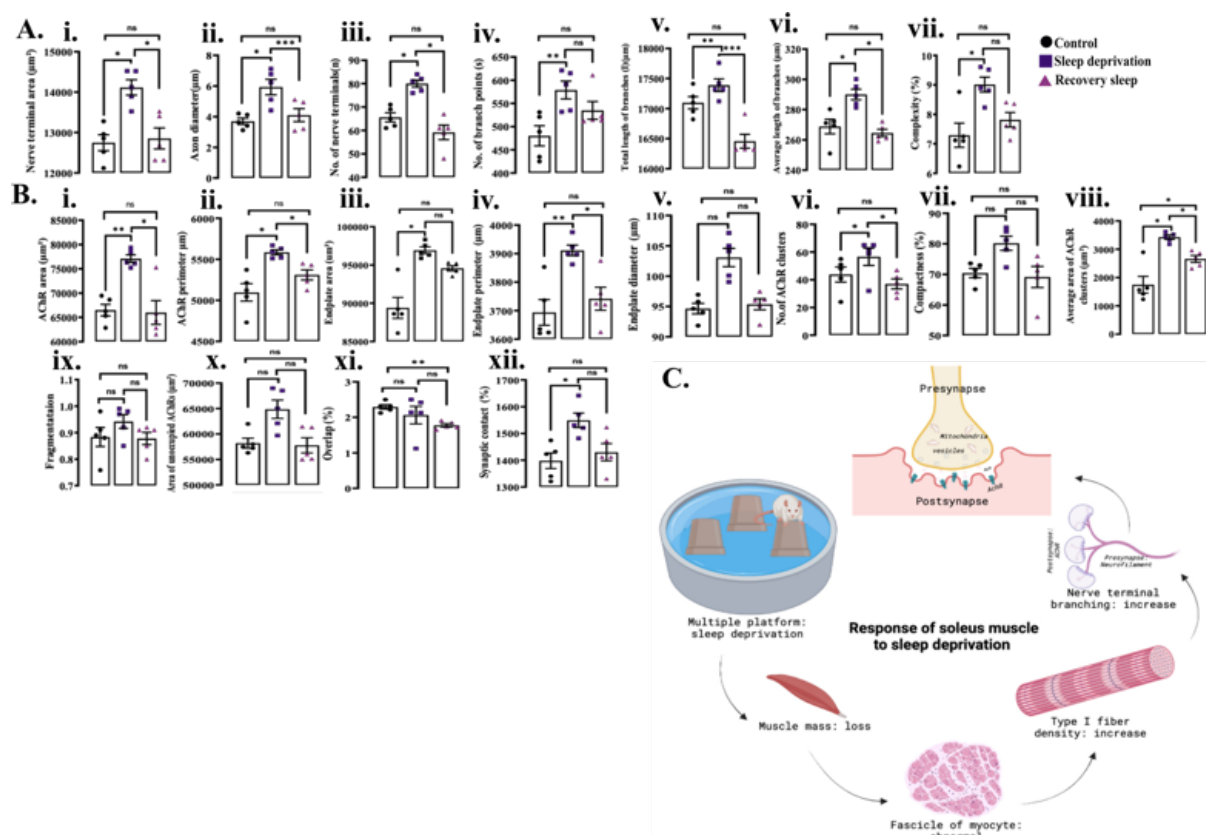

8  
 9 **Figure 3: Morphometric measurements in immune co-localization of pre and**  
 10 **postsynaptic proteins at the neuromuscular junction of rats after sleep deprivation and**  
 11 **recovery sleep**

12 (A) Presynaptic morphometric variables analyzed using ‘NMJ-Morph’ work flow, (i) nerve  
 13 terminal area ( $\mu\text{m}^2$ ), (ii) axon diameter ( $\mu\text{m}$ ), (iii) number of nerve terminal (n), (iv) number  
 14 of branch point(s), (v) total length of branches (l in  $\mu\text{m}$ ), (vi) average branch length ( $\mu\text{m}$ ), and

1 (vii) complexity (%) in the NMJ of soleus muscle of rats with normal sleep wake cycle (n=6,  
2 indicated by ●), rats subjected to 24 h sleep deprivation (n=6, indicated by ■) and in rats  
3 allowed to recover from 24 h sleep deprivation (n=6, indicated by ▲); (B) Post synaptic  
4 morphometric variables (i) ACh area ( $\mu\text{m}^2$ ), (ii) ACh perimeter ( $\mu\text{m}$ ), (iii) endplate area  
5 ( $\mu\text{m}^2$ ), (iv) endplate perimeter ( $\mu\text{m}$ ), (v) endplate diameter ( $\mu\text{m}$ ), (vi) number of ACh  
6 clusters, (vii) synaptic compactness (%), (viii) average area of AChs clusters ( $\mu\text{m}^2$ ), (ix)  
7 synaptic fragmentation, (x) area of unoccupied ACh ( $\mu\text{m}^2$ ), (xi) synaptic overlap (%), and  
8 (xii) synaptic contact (%) in the NMJ of soleus muscle of rats with normal sleep wake (n=6,  
9 indicated by ●), rats subjected to 24 h sleep deprivation (n=6, indicated by ■) and in rats  
10 allowed to recover from 24 h sleep deprivation (n=6, indicated by ▲); (C) Illustration  
11 explaining the changes after sleep deprivation in micro and macro structure (made using  
12 BioRender); The statistically significant values are represented as \* after applying one-way  
13 ANOVA followed by Bonferroni post-hoc test for parametric data and Kruskal-Walis with  
14 Dunn's multiple choice test was performed for non-parametric data. \*denotes significance  
15 where \* represents  $p < 0.05$  and \*\* represents  $p < 0.001$ , \*\*\*  $p < 0.0001$  and ns: not significant;  
16 data is represented as mean  $\pm$  SEM with individual data points (n=6/ group); ACh=  
17 acetylcholine receptor, 2H3= neurofilament-m, SV2= synaptic glycoprotein 2A, SYP=  
18 synaptophysin.

19

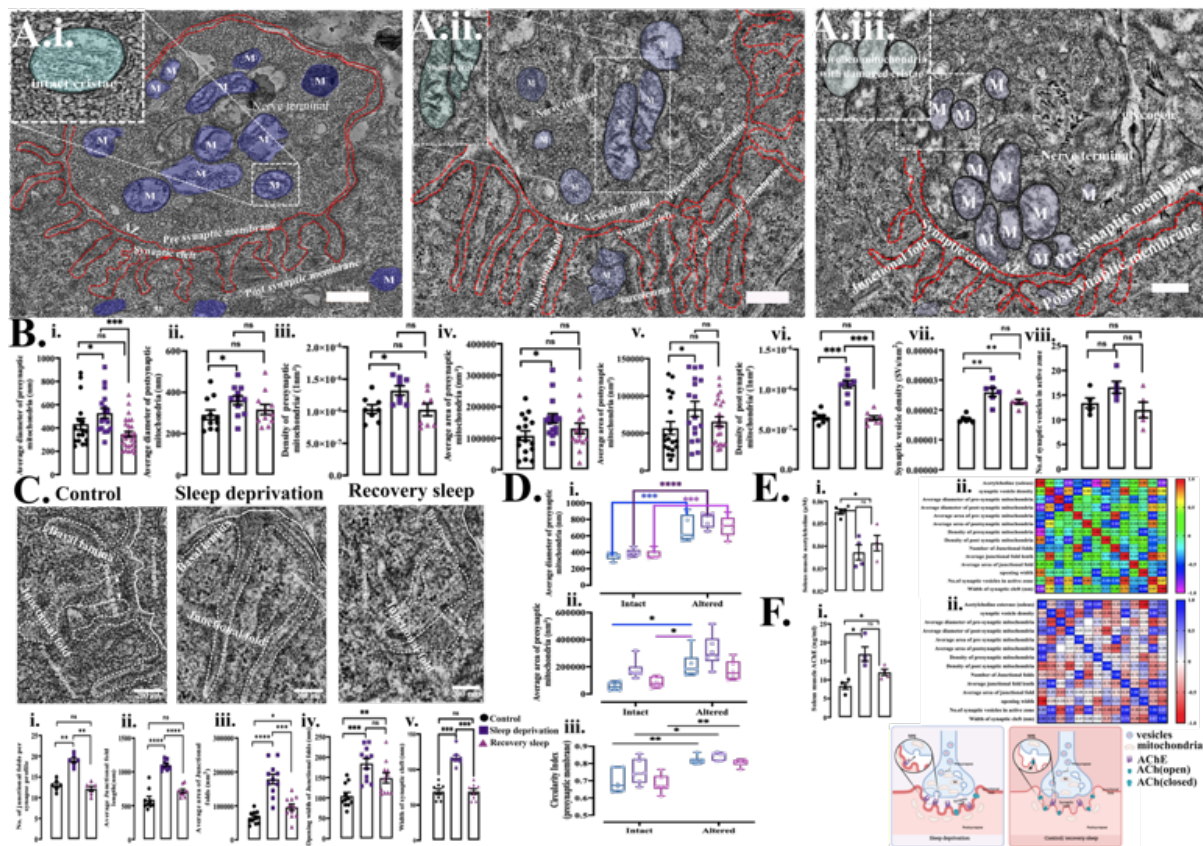

1  
2 **Figure 4: Ultrastructural changes in the transmission electron microscopic examination**  
3 **at the levels of NMJ in the rats after sleep deprivation and recovery sleep**

4 Comparative transmission electron microscopic images of (A.i.) control, (A.ii.) 24 h sleep  
5 deprivation, (A.iii.) recovery sleep with ultra-structures marked with scribble drawing and  
6 mitochondrial changes are magnified in the inset (scale bar= 500nm); (B) Panel showing the  
7 morphometric analysis performed in pre and postsynaptic variables average diameter of (i)  
8 presynaptic and (ii) postsynaptic terminal mitochondria (nm), the average area of (iii)  
9 presynaptic and (iv) postsynaptic terminal mitochondria (nm<sup>2</sup>), the density of (v) presynaptic  
10 and (vi) postsynaptic terminal mitochondria per (nm<sup>2</sup>), (vii) total density of synaptic vesicles  
11 (SV/nm<sup>2</sup>) in the presynaptic terminal, and the (viii) no. of synaptic vesicles within the 200nm  
12 distance of active zone (%); (C) comparative transmission electron microscopic images of the  
13 junctional fold at three groups as entitled at the each column with the morphometric analyses  
14 (scale bar= 200nm), (i) no. of junctional folds per synapse profile, (ii) junctional fold length

1 (nm), (iii) average area of junctional folds (nm<sup>2</sup>), (iv) opening width of junctional folds (nm),  
2 and the (v) width of the synaptic cleft (nm) (%) in the NMJ of soleus muscle of rats with  
3 normal sleep wake (n=6, indicated by ●), rats subjected to 24 h sleep deprivation (n=6,  
4 indicated by ■) and in rats allowed to recover from 24 h sleep deprivation (n=6, indicated  
5 by ▲); (D) Within group comparison between intact versus altered mitochondria, (i) the  
6 average diameter of presynaptic terminal mitochondria (nm), (ii) average area of presynaptic  
7 terminal mitochondria (nm<sup>2</sup>), (iii) circularity index of mitochondria of the presynaptic  
8 terminal in control (blue box-plot), 24 h sleep deprivation (purple box-plot) and sleep  
9 recovery (pink box-plot) rats; (E) expression of neurotransmitter and its relationship with the  
10 ultra-structural variables, (i) level of acetylcholine in homogenates of soleus muscle, (ii.)  
11 correlation matrix between acetylcholine and 13 synaptic variables; (F) expression of rate  
12 limiting enzyme in soleus muscle and its relationship with ultra-structural variables, (i.) level  
13 of acetylcholinesterase in the soleus muscle homogenate, (ii.) correlation matrix between  
14 acetylcholinesterase and 13 synaptic variables. (E) A model reflecting morpho-functional  
15 changes due to the 24 h sleep deprivation at the neuromuscular synapse (made using  
16 BioRender). The statistically significant values are represented as \* after applying one-way  
17 ANOVA followed by Bonferroni post-hoc test for parametric data and Kruskal-Walis with  
18 Dunn's multiple-choice test was performed for non-parametric data. \*denotes significance  
19 where \* represents p<0.05, \*\* represents p<0.001, \*\*\* p<0.0001 and ns: not significant; data  
20 is represented as mean ± SEM with individual data points (n=6/ group).

21
